# Supplementary material for: A highly selective “turn-on” fluorescent sensor for zinc ion based on a cinnamyl pyrazoline derivative and its imaging in live cells
Source: Royal Society of Chemistry journal article supplement (doi:10.1039/c8ay00037a), 2018-01-01
Supplement: c8ay00037a1.pdf [file c8ay00037a1.pdf]

## Supporting information

### A highly selective “turn-on” fluorescent sensor for zinc ion based on a pyrazoline derivative and its imaging in live cells

Yun-Shang Yang<sup>a</sup>, Chun-Mei Ma<sup>a</sup>, Ying-Peng Zhang<sup>a\*</sup>, Hua-Qing Xue<sup>a</sup>, Jia-Xi Ru<sup>b</sup>, Xiao-Yu Liu<sup>a</sup>, Hui-Chen Guo<sup>a,b\*</sup>

<sup>a</sup>School of Petrochemical Engineering, Lanzhou University of Technology, Lanzhou 730050, China

<sup>b</sup>State Key Laboratory of Veterinary Etiological Biology and Key Laboratory of Animal Virology of Ministry of Agriculture, Lanzhou Veterinary Research Institute, Chinese Academy of Agricultural Sciences, Lanzhou 730046, China

#### <sup>1</sup>H NMR <sup>13</sup>C NMR and ESI-MS spectra of products

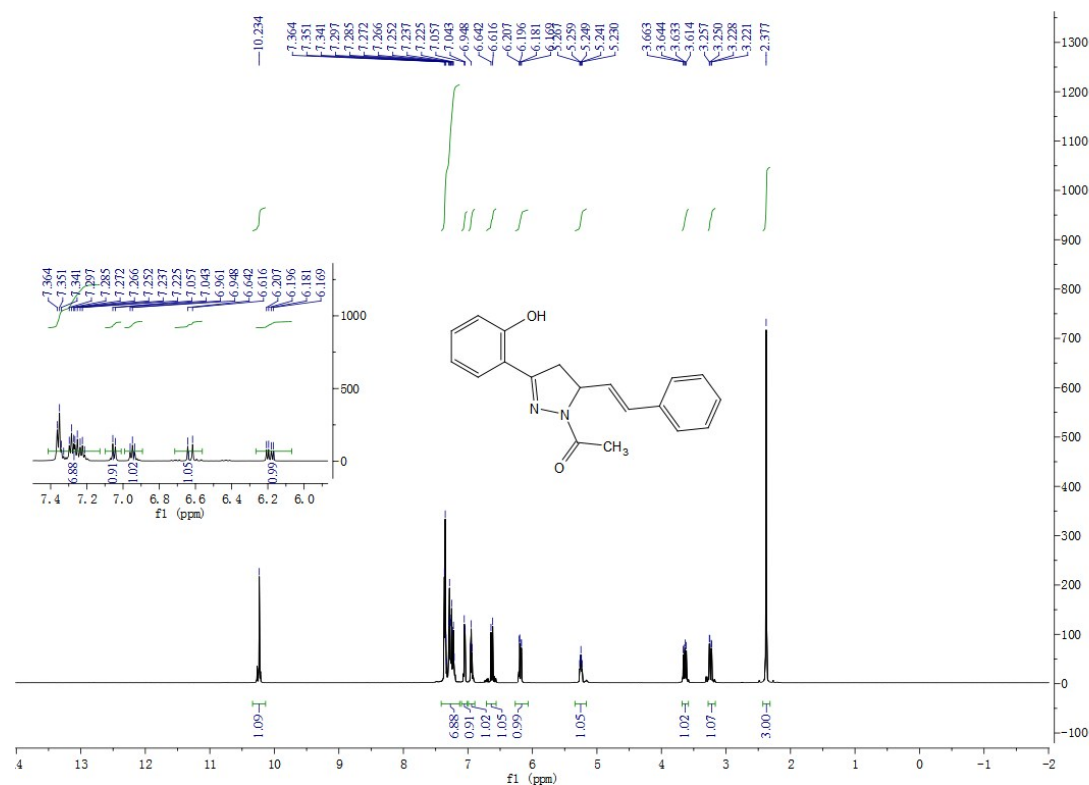

Fig S1.

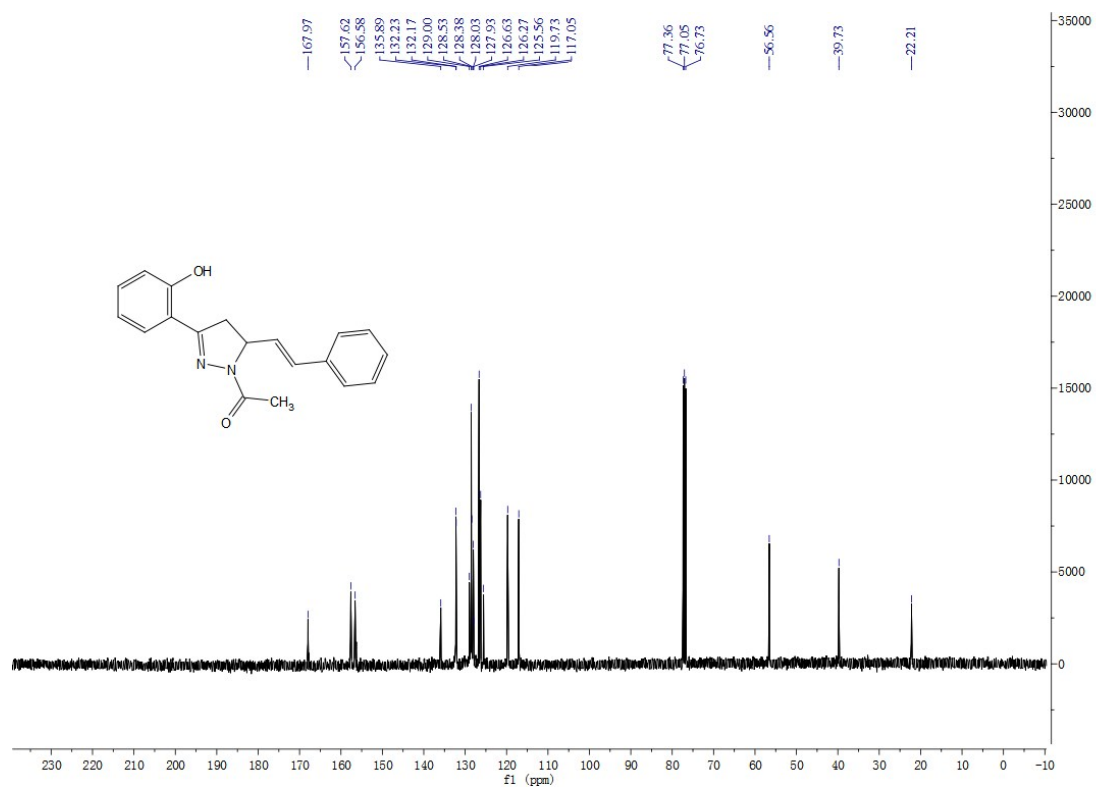

Fig S2.

## Generic Display Report

### Analysis Info

Analysis Name D:\Data\YANGY\New\XUECHUNHUA171117\_3.d  
Method NEG\_100-1200\_For LC.m  
Sample Name XUECHUNHUA171117\_3  
Comment

Acquisition Date 11/17/2017 5:52:16 PM

Operator LZU  
Instrument micrOTOF

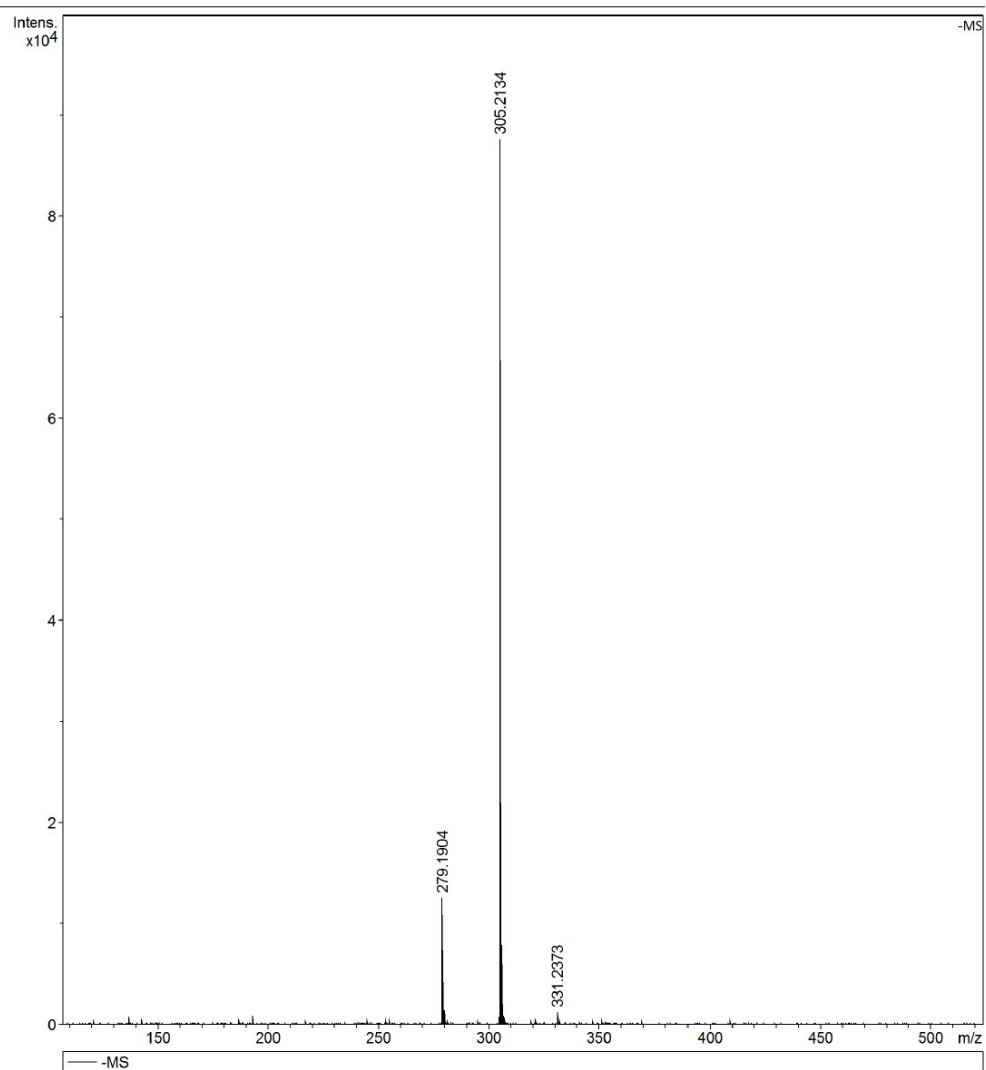

Fig S3.
